# Supplementary material for: Efficacy and safety of fenofibrate add-on therapy in patients with primary biliary cholangitis refractory to ursodeoxycholic acid: A retrospective study and updated meta-analysis
Source: Front Pharmacol. 2022 Aug 30;13:948362. doi: 10.3389/fphar.2022.948362 (PMC9468667; doi:10.3389/fphar.2022.948362)
Supplement: Supplementary file 1 [file Table2.xlsx]

## Sheet: Feuil1
			Supplementary table 2. Biochemical characteristics of patients with UDCA-refractory primary biliary cholangitis between “the FF group” and "the UDCA group" after one year of treatment
			Characteristic	UDCA+FF group	UDCA group	p value
				N=88	N=68
			ALP×ULN	1.3(0.7-2.1)	1.8(1.5-2.7)	p<0.001
			GGT×ULN	4.9(2.5-9.9)	4.3(2.0-7.3)	p=0.003
			ALT×ULN	1.2(0.8-1.7)	1.0(0.6-1.8)	p=0.973
			AST×ULN	1.2(1.1-2.2)	1.6(1.1-2.1)	p=0.263
			Tbil×ULN	0.8(0.6-1.4)	0.9(0.7-1.4)	p=0.023
			IgM×ULN	0.7(0.6-1.3)	1.1(0.8-1.6)	p=0.155
			CHO×ULN	0.9(0.7-1.1)	0.8(0.7-1.0)	p=0.032
			TG×ULN	0.8(0.5-1.1)	0.7(0.5-1.0)	p=0.322
			BU×ULN	0.6(0.5-0.7)	0.6(0.5-0.7)	p=0.193
			Scr×ULN	1.0(0.8-1.0)	0.9(0.8-1.1)	p=0.659
			eGFR (ml/min/1.73m2)	96(90-104)	95(88-102)	p=0.379
			Data are expressed as mean (±SD) or median and IQR. For continuous variables, paired t-test or Mann-Whitney U test was used for normal or non- normal distributed data. Chi-squared test for categorical variables Abbreviations: ALP, alkaline phosphatase; GGT, gamma-glutamyl transferase; ALT, alanine-aminotransferase; AST, aspartate-aminotransferase; Tbil, total bilirubin; IgM, immunoglobulin M; TG,…
