# Supplementary material for: Efficacy and safety of fenofibrate add-on therapy in patients with primary biliary cholangitis refractory to ursodeoxycholic acid: A retrospective study and updated meta-analysis
Source: Front Pharmacol. 2022 Aug 30;13:948362. doi: 10.3389/fphar.2022.948362 (PMC9468667; doi:10.3389/fphar.2022.948362)
Supplement: Supplementary file 2 [file Table3.xlsx]

## Sheet: Feuil1
		Supplementary table 3. Biochemical characteristics of patients with UDCA-refractory primary biliary cholangitis between “the FF group” and "the UDCA group" after five years of treatment
		Characteristic	UDCA+FF group	UDCA group	p value
			N=20	N=19
		ALP×ULN	0.9(0.6-1.1)	1.4(1.1-2.3)	P=0.001
		GGT×ULN	3.2(1.6-6.1)	3.1(1.7-6.0)	p=0.461
		ALT×ULN	0.6(0.5-1.2)	0.9(0.5-1.2)	p=0.647
		AST×ULN	1.1(1.0-1.7)	1.0(0.9-2.0)	p=0.813
		Tbil×ULN	0.7(0.5-1.0)	1.0(0.8-1.7)	p=0.149
		IgM×ULN	0.8(0.4-1.3)	0.9(0.5-1.4)	p=0.191
		CHO×ULN	0.9(0.7-1.0)	0.8(0.7-1.0)	p=0.607
		TG×ULN	0.6(0.4-0.8)	0.6(0.4-0.9)	p=0.945
		BU×ULN	0.7(0.6-0.8)	0.7(0.6-0.8)	p=0.444
		Scr×ULN	0.9(0.7-1.1)	0.9(0.8-1.0)	p=0.813
		eGFR (ml/min/1.73m2)	96(88-104)	96(86-99)	p=0.351
		Data are expressed as mean (±SD) or median and IQR. For continuous variables, paired t-test or Mann-Whitney U test was used for normal or non- normal distributed data. Chi-squared test for categorical variables Abbreviations: ALP, alkaline phosphatase; GGT, gamma-glutamyl transferase; ALT, alanine-aminotransferase; AST, aspartate-aminotransferase; Tbil, total bilirubin; IgM, immunoglobulin M; TG,…
