# Supplementary material for: Efficacy and safety of fenofibrate add-on therapy in patients with primary biliary cholangitis refractory to ursodeoxycholic acid: A retrospective study and updated meta-analysis
Source: Front Pharmacol. 2022 Aug 30;13:948362. doi: 10.3389/fphar.2022.948362 (PMC9468667; doi:10.3389/fphar.2022.948362)
Supplement: Supplementary file 3 [file Table4.xlsx]

## Sheet: Feuil1
		Supplementary table 4. Adverse events in our cohort study
		Adverse event	UDCA+FF	UDCA
		Allergic reaction	2	0
		Fatigue	1	0
		Self-limiting nausea,self-limiting nausea, abdominal pain and bloating	8	0
		Elevated transaminase levels	5	0
		Severe progression of TBIL levels	4	4
		Progression of cirrhosis and renal deterioration	1	0
		Total events	21	4
