# Supplementary material for: Efficacy and safety of fenofibrate add-on therapy in patients with primary biliary cholangitis refractory to ursodeoxycholic acid: A retrospective study and updated meta-analysis
Source: Front Pharmacol. 2022 Aug 30;13:948362. doi: 10.3389/fphar.2022.948362 (PMC9468667; doi:10.3389/fphar.2022.948362)
Supplement: Supplementary file 4 [file Table1.xlsx]

## Sheet: Feuil1
		Supplementary table 1. Fenofibrate-related adverse event
		Fenofibrate-related adverse event
		Heartburn
		Elevated ALT and AST
		Nausea
		Arthralgias
		Weight gain
		Dishydrotic eczema
		Increased appetite
		Diarrhoea
		Hot flashes
		Fatigue
		Rigours
		Renal insufficiency
