# Supplementary material for: Efficacy and safety of fenofibrate add-on therapy in patients with primary biliary cholangitis refractory to ursodeoxycholic acid: A retrospective study and updated meta-analysis
Source: Front Pharmacol. 2022 Aug 30;13:948362. doi: 10.3389/fphar.2022.948362 (PMC9468667; doi:10.3389/fphar.2022.948362)
Supplement: Supplementary file 6 [file Table5.xlsx]

## Sheet: Feuil1
				Supplementary table 5. Current statements about fibrates from the three continents.
				Association	Year	statement about fibrates
				Chinese Society of Hepatology, Chinese Medical Association.	2021	Patients with poor response to UDCA can also be treated with benzabet (400 mg/d) or fenofibrate (at a commonly used dose of 200 mg / d).fibrate is not recommended for patients with decompensated cirrhosis.In addition, when using fibrate, attention should be paid to monitoring indicators of drug-induced liver injury (especially bilirubin changes) and other related side effects.（B1）
				European Association for the Study of the Liver	2021	Data from phase III randomised trials for budesonide (in non-cirrhotic patients), and bezafibrate, both in combination with UDCA, are not yet published; EASL suggests currently a recommendation for therapy cannot be made. (II-2, 2)
				the American Association for the Study of Liver Diseases	2017	Fibrates can be considered as off-label alternatives for patients with PBC and inadequate response
